# Supplementary material
Source: Research Square preprint supplement (doi:10.21203/rs.3.rs-8596509/v1)
Supplement: Supplementary file 1 [file 9a235226c5acc5a6b8b9d625.xlsx]

## Sheet: Sheet1
Supplementary Table. List of antibacterial agents and their corresponding ATC codes
ATC* code	Classification
J01AA01	Tetracyclines
J01AA02	Tetracyclines
J01AA07	Tetracyclines
J01AA08	Tetracyclines
J01AA12	Tetracyclines
J01CA01	Penicillins
J01CA04	Penicillins
J01CA06	Penicillins
J01CA08	Penicillins
J01CA12	Penicillins
J01CA19	Penicillins
J01CAXA	Penicillins
J01CE01	Penicillins
J01CE08	Penicillins
J01CR01	Penicillins
J01CR02	Penicillins
J01CR04	Penicillins
J01CR05	Penicillins
J01CR50	Penicillins
A02BD03	Penicillins
A02BD07	Penicillins
A02BD12	Penicillins
A02BD13	Penicillins
A02BD14	Penicillins
A02BD15	Penicillins
J01DB01	Cephalosporins
J01DB03	Cephalosporins
J01DB04	Cephalosporins
J01DB05	Cephalosporins
J01DB07	Cephalosporins
J01DB11	Cephalosporins
J01DC02	Cephalosporins
J01DC04	Cephalosporins
J01DC07	Cephalosporins
J01DC09	Cephalosporins
J01DC12	Cephalosporins
J01DC13	Cephalosporins
J01DC14	Cephalosporins
J01DD01	Cephalosporins
J01DD02	Cephalosporins
J01DD04	Cephalosporins
J01DD05	Cephalosporins
J01DD06	Cephalosporins
J01DD08	Cephalosporins
J01DD09	Cephalosporins
J01DD12	Cephalosporins
J01DD13	Cephalosporins
J01DD14	Cephalosporins
J01DD15	Cephalosporins
J01DD16	Cephalosporins
J01DD17	Cephalosporins
J01DD18	Cephalosporins
J01DD62	Cephalosporins
J01DE01	Cephalosporins
J01DE02	Cephalosporins
J01DE03	Cephalosporins
J01DI54	Cephalosporins
J01FA01	Macrolides
J01FA02	Macrolides
J01FA03	Macrolides
J01FA06	Macrolides
J01FA07	Macrolides
J01FA09	Macrolides
J01FA10	Macrolides
J01FA12	Macrolides
J01FA15	Macrolides
A02BD07	Macrolides
A02BD12	Macrolides
A02BD14	Macrolides
J01MA01	Quinolones
J01MA02	Quinolones
J01MA04	Quinolones
J01MA06	Quinolones
J01MA07	Quinolones
J01MA09	Quinolones
J01MA12	Quinolones
J01MA14	Quinolones
J01MA17	Quinolones
J01MA18	Quinolones
J01MA19	Quinolones
J01MA21	Quinolones
J01MA22	Quinolones
J01MA25	Quinolones
J01MB02	Quinolones
J01MB03	Quinolones
J01MB04	Quinolones
J01MB06	Quinolones
J01EB02	Sulfonamides/Trimethoprim
J01EC01	Sulfonamides/Trimethoprim
J01ED01	Sulfonamides/Trimethoprim
J01EE01	Sulfonamides/Trimethoprim
J01XD01	Nitroimidazoles
P01AB01	Nitroimidazoles
P01AB02	Nitroimidazoles
A02BD03	Nitroimidazoles
A02BD13	Nitroimidazoles
A02BD15	Nitroimidazoles
A07AA05	Other antibacterials
A07AA06	Other antibacterials
A07AA08	Other antibacterials
A07AA09	Other antibacterials
A07AA10	Other antibacterials
A07AA11	Other antibacterials
A07AA12	Other antibacterials
A07EC01	Other antibacterials
J01BA01	Other antibacterials
J01DF01	Other antibacterials
J01DF02	Other antibacterials
J01DH02	Other antibacterials
J01DH04	Other antibacterials
J01DH05	Other antibacterials
J01DH06	Other antibacterials
J01DH51	Other antibacterials
J01DH55	Other antibacterials
J01DH56	Other antibacterials
J01FF01	Other antibacterials
J01FF02	Other antibacterials
J01FG02	Other antibacterials
J01GA01	Other antibacterials
J01GB01	Other antibacterials
J01GB03	Other antibacterials
J01GB04	Other antibacterials
J01GB06	Other antibacterials
J01GB09	Other antibacterials
J01GB10	Other antibacterials
J01GB11	Other antibacterials
J01GB12	Other antibacterials
J01GB13	Other antibacterials
J01XA01	Other antibacterials
J01XA02	Other antibacterials
J01XB01	Other antibacterials
J01XX01	Other antibacterials
J01XX04	Other antibacterials
J01XX08	Other antibacterials
J01XX09	Other antibacterials
J01XX11	Other antibacterials
J04AA03	Other antibacterials
J04AB01	Other antibacterials
J04AB02	Other antibacterials
J04AB04	Other antibacterials
J04AB06	Other antibacterials
J04AC01	Other antibacterials
J04AD03	Other antibacterials
J04AK01	Other antibacterials
J04AK02	Other antibacterials
J04AK05	Other antibacterials
J04AK06	Other antibacterials
J04BA01	Other antibacterials
P01AX06	Other antibacterials
P01BA03	Other antibacterials
P01BB51	Other antibacterials
P01BC01	Other antibacterials
P01BC02	Other antibacterials
P01BD51	Other antibacterials
P01BF01	Other antibacterials
P01CX01	Other antibacterials
P02BA01	Other antibacterials
P02CA01	Other antibacterials
P02CA03	Other antibacterials
P02CB02	Other antibacterials
P02CC01	Other antibacterials
P02CF01	Other antibacterials
A01AB09	Antifungals
A07AA02	Antifungals
A07AA07	Antifungals
D01BA02	Antifungals
D01BA03	Antifungals
J02AA01	Antifungals
J02AB01	Antifungals
J02AC01	Antifungals
J02AC02	Antifungals
J02AC03	Antifungals
J02AC04	Antifungals
J02AC05	Antifungals
J02AX01	Antifungals
J02AX04	Antifungals
J02AX05	Antifungals
J05AB01	Antivirals (general)
J05AB03	Antivirals (general)
J05AB06	Antivirals (general)
J05AB09	Antivirals (general)
J05AB11	Antivirals (general)
J05AB14	Antivirals (general)
J05AB16	Antivirals (general)
J05AB18	Antivirals (general)
J05AD01	Antivirals (general)
J05AE01	Antivirals (general)
J05AE02	Antivirals (general)
J05AE03	Antivirals (general)
J05AE04	Antivirals (general)
J05AE07	Antivirals (general)
J05AE08	Antivirals (general)
J05AE10	Antivirals (general)
J05AE30	Antivirals (general)
J05AEXA	Antivirals (general)
J05AEXB	Antivirals (general)
J05AF01	Antivirals (general)
J05AF02	Antivirals (general)
J05AF04	Antivirals (general)
J05AF05	Antivirals (general)
J05AF06	Antivirals (general)
J05AF07	Antivirals (general)
J05AF08	Antivirals (general)
J05AF09	Antivirals (general)
J05AF10	Antivirals (general)
J05AF13	Antivirals (general)
J05AG01	Antivirals (general)
J05AG02	Antivirals (general)
J05AG03	Antivirals (general)
J05AG04	Antivirals (general)
J05AG05	Antivirals (general)
J05AG06	Antivirals (general)
J05AH02	Antivirals (general)
J05AH03	Antivirals (general)
J05AJ01	Antivirals (general)
J05AJ03	Antivirals (general)
J05AJ04	Antivirals (general)
J05AR01	Antivirals (general)
J05AR02	Antivirals (general)
J05AR03	Antivirals (general)
J05AR08	Antivirals (general)
J05AR09	Antivirals (general)
J05AR10	Antivirals (general)
J05AR13	Antivirals (general)
J05AR14	Antivirals (general)
J05AR17	Antivirals (general)
J05AR18	Antivirals (general)
J05AR19	Antivirals (general)
J05AR20	Antivirals (general)
J05AR21	Antivirals (general)
J05AR22	Antivirals (general)
J05AR25	Antivirals (general)
J05AX09	Antivirals (general)
J05AX18	Antivirals (general)
J05AX25	Antivirals (general)
J05AX26	Antivirals (general)
J06BB16	Antivirals (general)
J06BB21	Antivirals (general)
J06BD03	Antivirals (general)
J06BD05	Antivirals (general)
J06BD07	Antivirals (general)
J07BN01	Antivirals (general)
J07BN02	Antivirals (general)
J07BN04	Antivirals (general)
J05AP01	Antivirals (HCV specific)
J05AP02	Antivirals (HCV specific)
J05AP05	Antivirals (HCV specific)
J05AP06	Antivirals (HCV specific)
J05AP07	Antivirals (HCV specific)
J05AP08	Antivirals (HCV specific)
J05AP10	Antivirals (HCV specific)
J05AP11	Antivirals (HCV specific)
J05AP51	Antivirals (HCV specific)
J05AP53	Antivirals (HCV specific)
J05AP55	Antivirals (HCV specific)
J05AP57	Antivirals (HCV specific)
J05AP58	Antivirals (HCV specific)
*ATC, Anatomical Therapeutic Chemical classification system. Antibiotics were categorized based on their ATC codes according to the WHO Collaborating Centre for Drug Statistics Methodology.
